# Supplementary material for: The controlled deposition of Cu2(ZnyFe1−y)SnS4, Cu2(ZnyFe1−y)SnSe4and Cu2(ZnyFe1−y)Sn(SxSe1−x)4thin films by AACVD: potential solar cell materials based on earth abundant elements
Source: Royal Society of Chemistry journal article supplement (doi:10.1039/c5tc00867k), 2015-01-01
Supplement: c5tc00867k1.pdf [file c5tc00867k1.pdf]

## Supporting Information

### The Deposition of $\text{Cu}_2(\text{Zn}_y\text{Fe}_{1-y})\text{SnS}_4$ , $\text{Cu}_2(\text{Zn}_y\text{Fe}_{1-y})\text{SnSe}_4$ and $\text{Cu}_2(\text{Zn}_y\text{Fe}_{1-y})\text{Sn}(\text{S}_x\text{Se}_{1-x})_4$ Thin Films by AACVD

Punarja Kevin,<sup>a</sup> Mohammad Azad Malik,<sup>\*b</sup> Paul O'Brien<sup>\*ab</sup>

#### X-ray Diffraction Studies

#### Rietveld refinements of p-XRD patterns

**Table S1:** Rietveld analysis results of CZFTS thin films deposited at 350°C using the molar ratio 2:1:0.5:0.5:1 of  $[\text{Cu}(\text{S}_2\text{CNET}_2)_2]:[\text{Fe}(\text{S}_2\text{CNET}_2)_3]:[\text{Zn}(\text{S}_2\text{CNET}_2)_2]:[\text{nBu}_2\text{Sn}(\text{S}_2\text{CNET}_2)_2]$  precursors in 20 ml THF. Fitted against Zn- rich  $\text{Cu}_2\text{Fe}_{0.3}\text{Zn}_{0.7}\text{Sn}_1\text{S}_4$  phase (ICDD 04-015-0225) with resultant lattice parameters  $a = 5.41$  (2) Å and  $c = 10.86$  (4) Å.  $R_{wp} = 2.85$ .

|    | h | k | l | m  | d       | 2θ       |
|----|---|---|---|----|---------|----------|
| 1  | 1 | 1 | 0 | 4  | 3.82760 | 23.21996 |
| 2  | 1 | 1 | 2 | 8  | 3.12848 | 28.50799 |
| 3  | 0 | 1 | 3 | 8  | 3.00914 | 29.66405 |
| 4  | 0 | 0 | 4 | 2  | 2.71503 | 32.96427 |
| 5  | 0 | 2 | 0 | 4  | 2.70652 | 33.07088 |
| 6  | 0 | 2 | 2 | 8  | 2.42230 | 37.08435 |
| 7  | 2 | 1 | 1 | 16 | 2.36280 | 38.05370 |
| 8  | 1 | 1 | 4 | 8  | 2.21449 | 40.71109 |
| 9  | 0 | 1 | 5 | 8  | 2.01580 | 44.93145 |
| 10 | 2 | 1 | 3 | 16 | 2.01231 | 45.01365 |
| 11 | 2 | 0 | 4 | 8  | 1.91680 | 47.38986 |
| 12 | 2 | 2 | 0 | 4  | 1.91380 | 47.46874 |
| 13 | 0 | 0 | 6 | 2  | 1.81002 | 50.37407 |
| 14 | 2 | 2 | 2 | 8  | 1.80497 | 50.52475 |
| 15 | 0 | 3 | 1 | 8  | 1.77995 | 51.28628 |
| 16 | 3 | 1 | 0 | 8  | 1.71175 | 53.48805 |
| 17 | 1 | 1 | 6 | 8  | 1.63629 | 56.16724 |
| 18 | 3 | 1 | 2 | 16 | 1.63256 | 56.30699 |
| 19 | 2 | 1 | 5 | 16 | 1.61667 | 56.91050 |
| 20 | 0 | 3 | 3 | 8  | 1.61487 | 56.97981 |
| 21 | 2 | 2 | 4 | 8  | 1.56424 | 59.00238 |
| 22 | 0 | 2 | 6 | 8  | 1.50457 | 61.59058 |
| 23 | 0 | 1 | 7 | 8  | 1.49140 | 62.19477 |
| 24 | 3 | 2 | 1 | 16 | 1.48716 | 62.39162 |
| 25 | 3 | 1 | 4 | 16 | 1.44799 | 64.27829 |
| 26 | 0 | 3 | 5 | 8  | 1.38792 | 67.42177 |
| 27 | 3 | 2 | 3 | 16 | 1.38678 | 67.48466 |
| 28 | 0 | 0 | 8 | 2  | 1.35751 | 69.14278 |
| 29 | 0 | 4 | 0 | 4  | 1.35326 | 69.39124 |
| 30 | 2 | 2 | 6 | 8  | 1.31504 | 71.71373 |
| 31 | 0 | 4 | 2 | 8  | 1.31310 | 71.83605 |
| 32 | 2 | 1 | 7 | 16 | 1.30621 | 72.27411 |
| 33 | 4 | 1 | 1 | 16 | 1.30337 | 72.45698 |
| 34 | 1 | 1 | 8 | 8  | 1.27943 | 74.03570 |
| 35 | 3 | 3 | 0 | 4  | 1.27587 | 74.27724 |
| 36 | 3 | 1 | 6 | 16 | 1.24368 | 76.54020 |
| 37 | 3 | 3 | 2 | 8  | 1.24204 | 76.65964 |

|    |   |   |   |    |         |          |
|----|---|---|---|----|---------|----------|
| 38 | 3 | 2 | 5 | 16 | 1.23500 | 77.17695 |
| 39 | 4 | 1 | 3 | 16 | 1.23420 | 77.23652 |
| 40 | 0 | 2 | 8 | 8  | 1.21343 | 78.81156 |
| 41 | 0 | 4 | 4 | 8  | 1.21115 | 78.98916 |
| 42 | 4 | 2 | 0 | 8  | 1.21039 | 79.04833 |
| 43 | 4 | 2 | 2 | 16 | 1.18140 | 81.38853 |
| 44 | 0 | 1 | 9 | 8  | 1.17777 | 81.69240 |
| 45 | 0 | 3 | 7 | 8  | 1.17638 | 81.80980 |

**Table S2:** Rietveld analysis results of CZFTS thin films deposited at 350°C using the molar ratio 2 : 1 : 0.7 : 0.3 : 1 of [Cu(S<sub>2</sub>CNET<sub>2</sub>)<sub>2</sub>] : [Fe(S<sub>2</sub>CNET<sub>2</sub>)<sub>3</sub>] : [Zn(S<sub>2</sub>CNET<sub>2</sub>)<sub>2</sub>] : [nBu<sub>2</sub>Sn(S<sub>2</sub>CNET<sub>2</sub>)<sub>2</sub>] precursors in 20 ml THF. Fitted against Fe – rich phase of Cu<sub>2</sub>Fe<sub>0.7</sub>Zn<sub>0.3</sub>Sn<sub>1</sub>S<sub>4</sub> (ICDD: 01-015-0228) with resultant lattice parameters a = 5.42Å, c = 10.83Å and Rwp = 2.43.

|    | h | k | l | m  | d       | th2      |
|----|---|---|---|----|---------|----------|
| 1  | 1 | 1 | 2 | 8  | 3.12702 | 28.52165 |
| 2  | 0 | 1 | 3 | 8  | 3.00404 | 29.71556 |
| 3  | 0 | 2 | 0 | 4  | 2.70833 | 33.04818 |
| 4  | 0 | 0 | 4 | 2  | 2.70757 | 33.05762 |
| 5  | 0 | 2 | 2 | 8  | 2.42227 | 37.08490 |
| 6  | 2 | 1 | 1 | 16 | 2.36399 | 38.03374 |
| 7  | 1 | 1 | 4 | 8  | 2.21093 | 40.77952 |
| 8  | 2 | 1 | 3 | 16 | 2.01152 | 45.03220 |
| 9  | 0 | 1 | 5 | 8  | 2.01121 | 45.03948 |
| 10 | 2 | 2 | 0 | 4  | 1.91508 | 47.43512 |
| 11 | 0 | 2 | 4 | 8  | 1.91481 | 47.44212 |
| 12 | 2 | 2 | 2 | 8  | 1.80550 | 50.50914 |
| 13 | 0 | 0 | 6 | 2  | 1.80505 | 50.52248 |
| 14 | 0 | 3 | 1 | 8  | 1.78097 | 51.25464 |
| 15 | 3 | 1 | 0 | 8  | 1.71290 | 53.44952 |
| 16 | 3 | 1 | 2 | 16 | 1.63314 | 56.28506 |
| 17 | 1 | 1 | 6 | 8  | 1.63281 | 56.29744 |
| 18 | 0 | 3 | 3 | 8  | 1.61484 | 56.98070 |
| 19 | 2 | 1 | 5 | 16 | 1.61468 | 56.98684 |
| 20 | 2 | 2 | 4 | 8  | 1.56351 | 59.03282 |
| 21 | 0 | 2 | 6 | 8  | 1.50202 | 61.70654 |
| 22 | 3 | 2 | 1 | 16 | 1.48806 | 62.34978 |
| 23 | 0 | 1 | 7 | 8  | 1.48769 | 62.36722 |
| 24 | 3 | 1 | 4 | 16 | 1.44755 | 64.30038 |
| 25 | 3 | 2 | 3 | 16 | 1.38701 | 67.47207 |
| 26 | 0 | 3 | 5 | 8  | 1.38690 | 67.47764 |
| 27 | 0 | 4 | 0 | 4  | 1.35416 | 69.33832 |
| 28 | 0 | 0 | 8 | 2  | 1.35379 | 69.36033 |
| 29 | 0 | 4 | 2 | 8  | 1.31371 | 71.79729 |
| 30 | 2 | 2 | 6 | 8  | 1.31354 | 71.80814 |
| 31 | 4 | 1 | 1 | 16 | 1.30417 | 72.40511 |
| 32 | 2 | 1 | 7 | 16 | 1.30392 | 72.42131 |
| 33 | 3 | 3 | 0 | 4  | 1.27672 | 74.21935 |
| 34 | 1 | 1 | 8 | 8  | 1.27640 | 74.24075 |
| 35 | 3 | 3 | 2 | 8  | 1.24265 | 76.61543 |
| 36 | 3 | 1 | 6 | 16 | 1.24250 | 76.62601 |
| 37 | 4 | 1 | 3 | 16 | 1.23453 | 77.21189 |
| 38 | 3 | 2 | 5 | 16 | 1.23446 | 77.21717 |
| 39 | 4 | 2 | 0 | 8  | 1.21120 | 78.98526 |
| 40 | 0 | 4 | 4 | 8  | 1.21113 | 78.99051 |
| 41 | 0 | 2 | 8 | 8  | 1.21093 | 79.00624 |
| 42 | 4 | 2 | 2 | 16 | 1.18199 | 81.33876 |
| 43 | 0 | 3 | 7 | 8  | 1.17485 | 81.93898 |
| 44 | 0 | 1 | 9 | 8  | 1.17473 | 81.94939 |

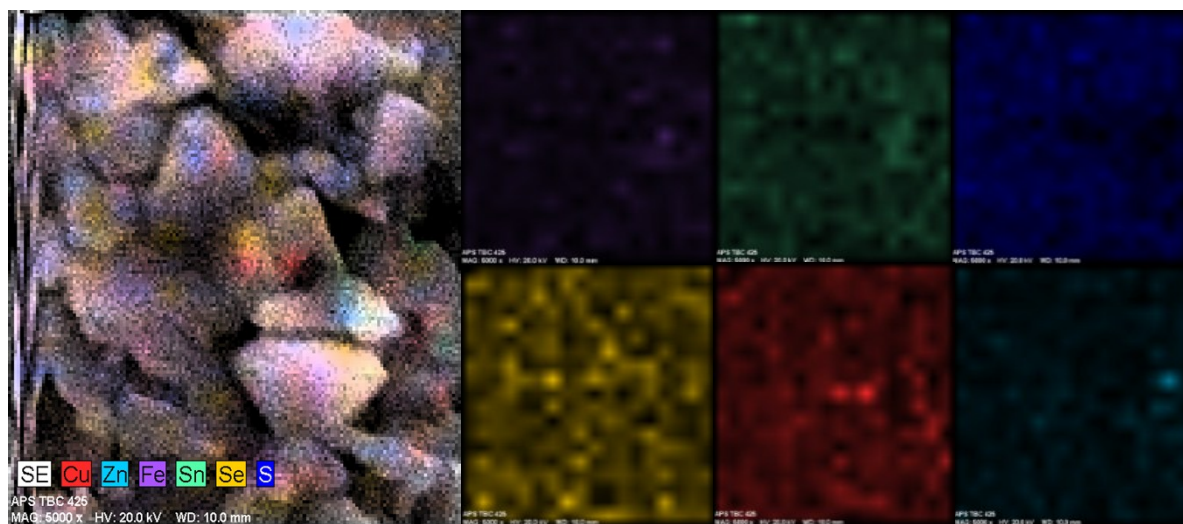

**Figure S1:** Elemental map of CZFTSSe thin film obtained at 350 °C.

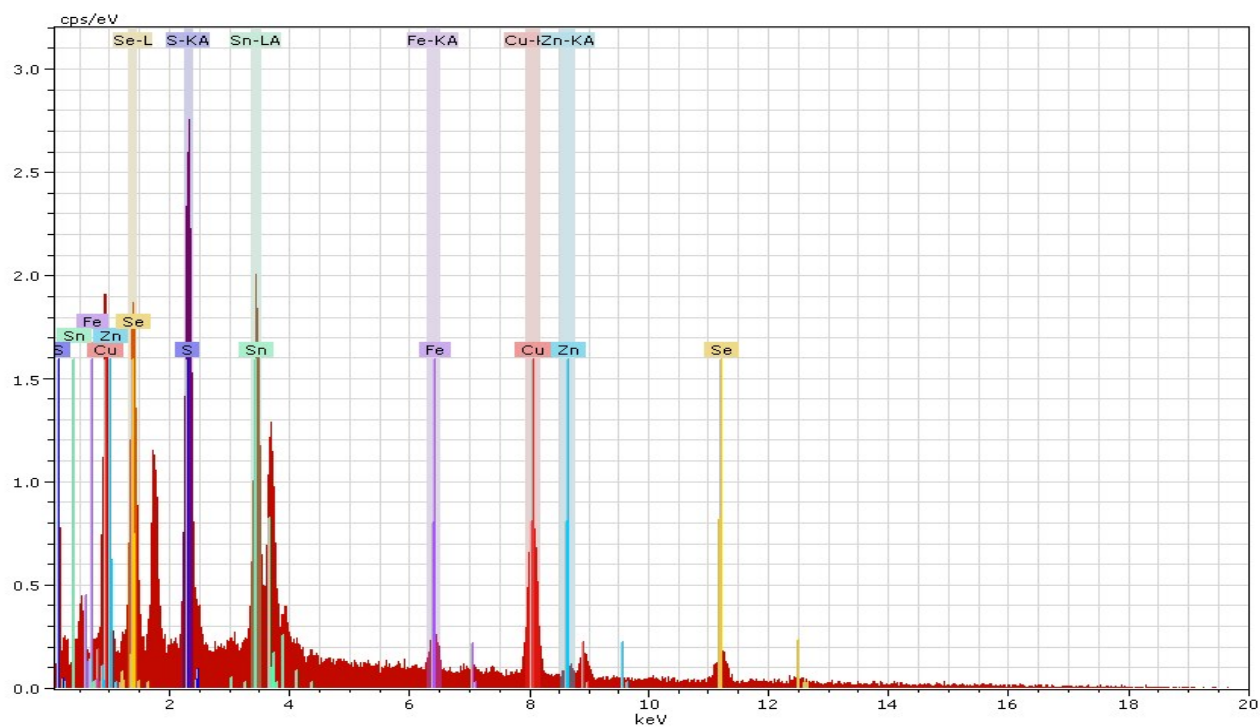

**Figure S2:** Elemental map/ EDX result of CZFTSSe thin film obtained at 350 °C.

**Table S3:** Band gap measurement from Tauc Plots.

| Material                                                                        | % Fe (y) | Intercept (a) | Slope (b) | BG (eV) | R <sup>2</sup> |
|---------------------------------------------------------------------------------|----------|---------------|-----------|---------|----------------|
| $\text{Cu}_2(\text{Zn}_y\text{Fe}_{1-y})\text{SnSe}_4$                          | 3        | 2.66E-04      | 1.80E-04  | 1.48    | 8.994          |
| $\text{Cu}_2(\text{Zn}_y\text{Fe}_{1-y})\text{SnSe}_4$                          | 7        | 4.25E-05      | 2.89E-05  | 1.47    | 7.885          |
| $\text{Cu}_2(\text{Zn}_y\text{Fe}_{1-y})\text{Sn}(\text{S}_x\text{Se}_{1-x})_4$ | 4        | 4.79E-05      | 2.98E-05  | 1.61    | 9.192          |
| $\text{Cu}_2(\text{Zn}_y\text{Fe}_{1-y})\text{Sn}(\text{S}_x\text{Se}_{1-x})_4$ | 6        | 7.17E-05      | 4.37E-05  | 1.64    | 9.822          |
| $\text{Cu}_2(\text{Zn}_y\text{Fe}_{1-y})\text{SnS}_4$                           | 3        | 2.49E-04      | 1.49E-04  | 1.67    | 8.792          |
| $\text{Cu}_2(\text{Zn}_y\text{Fe}_{1-y})\text{SnS}_4$                           | 7        | 7.60E-04      | 4.42E-04  | 1.72    | 9.324          |

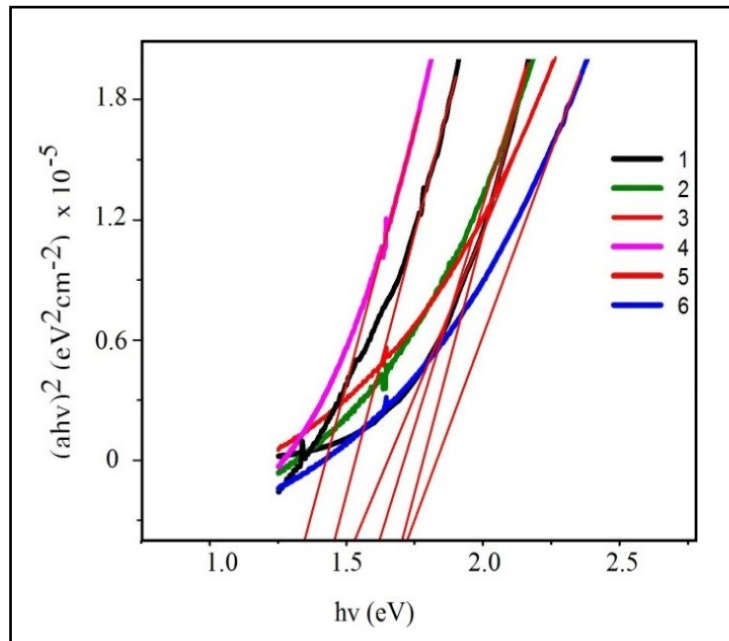**Figure S3:** UV- Vis Tauc plots of CZFTSe (1,2), CZFTSSe (3, 4) and CZFTS (5, 6), thin films deposited at 350 °C using different Zn and Fe precursor composition, y represent mole fraction of Zn.

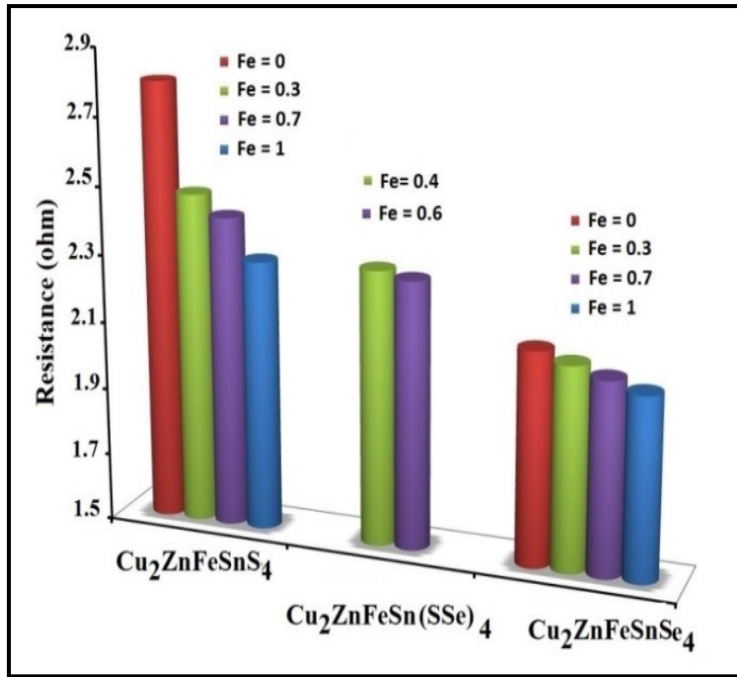

**Figure S4** : Variation of electrical resistance with stoichiometric ratio of Fe for CZFTS, CZFTSe and CZFTSSe thin films deposited at 350 °C.
